# Supplementary material
Source: publisher site journal article supplement (https://www.spandidos-publications.com/2931/downloadSupplementary)
Supplement: Supplementary file 1 [file downloadSupplementary]

Figure S1. HSYB and DOX inhibit HaCaT and MCF-7 cell viability. Viability of HaCaT and MCF-7 cells treated with different concentrations of (A) DOX or (B) HSYB for 24 h was measured by MTT assay. All data are expressed as the mean  $\pm$  SD (n=3). \*\*P<0.01 vs. control; #P<0.05 vs. MCF-7 cells. DOX, doxorubicin; HSYB, hydroxyl safflower yellow B.

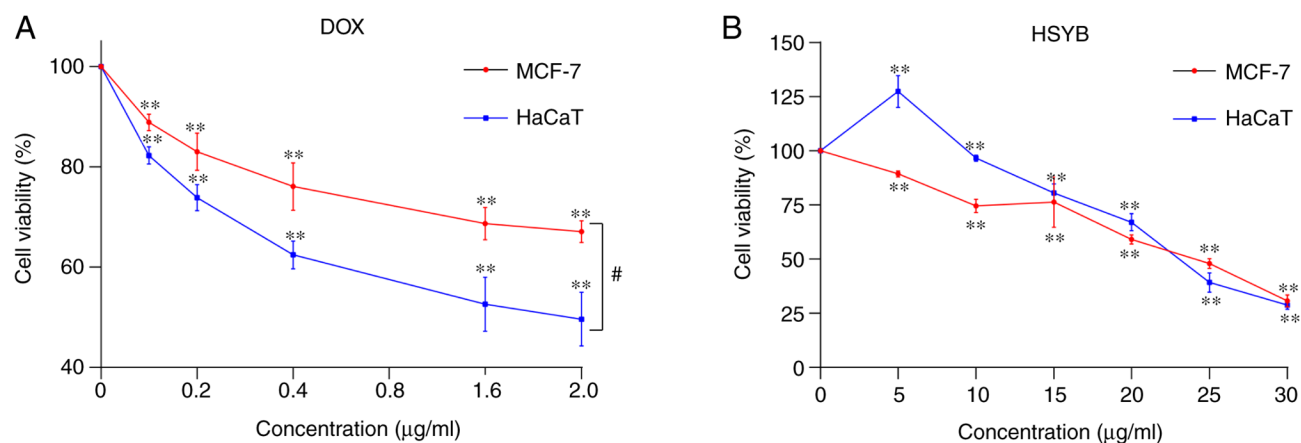

Table SI. CI of the combination of DOX and HSYB on MCF-7 cells.

| Concentration, $\mu\text{g/ml}$ |      | MCF-7 cells |          |
|---------------------------------|------|-------------|----------|
| DOX                             | HSYB | CI          | Fa       |
| 0.2                             | 6    | 0.866       | 0.208763 |
| 0.4                             | 6    | 0.519       | 0.344311 |
| 0.8                             | 6    | 0.612       | 0.374367 |
| 1.6                             | 6    | 0.837       | 0.393417 |
| 2                               | 6    | 0.852       | 0.416355 |

CI, combination index; Fa, effect level; DOX, doxorubicin; HSYB, hydroxyl safflower yellow B.
